# Supplementary material for: A new method to synthesize very active and stable supported metal Pt catalysts: thermo-destabilization of microemulsions
Source: Royal Society of Chemistry journal article supplement (doi:10.1039/c2jm15468d), 2012-01-01
Supplement: c2jm15468d.pdf [file c2jm15468d.pdf]

## Supporting information

### A new method to synthesize very active and stable supported metal Pt catalysts: thermo-destabilization of microemulsions

Riny Y. Parapat<sup>1</sup>, Veronica Parwoto<sup>1</sup>, Michael Schwarze<sup>1</sup>, Bingsen Zhang<sup>2</sup>, Dang Sheng Su<sup>2</sup>, Reinhard Schomäcker<sup>1</sup>,

<sup>1</sup>Technische Universität Berlin, Strasse des 17. Juni 124, 10623 Berlin/Germany

<sup>2</sup>Fritz Haber Institute of the Max Plank Society, Faradayweg 4-6, 14195 Berlin/Germany

email: [rinyyolandha@mailbox.tu-berlin.de](mailto:rinyyolandha@mailbox.tu-berlin.de); [schomaecker@tu-berlin.de](mailto:schomaecker@tu-berlin.de)

#### 1. Preparation of Pt nanoparticles

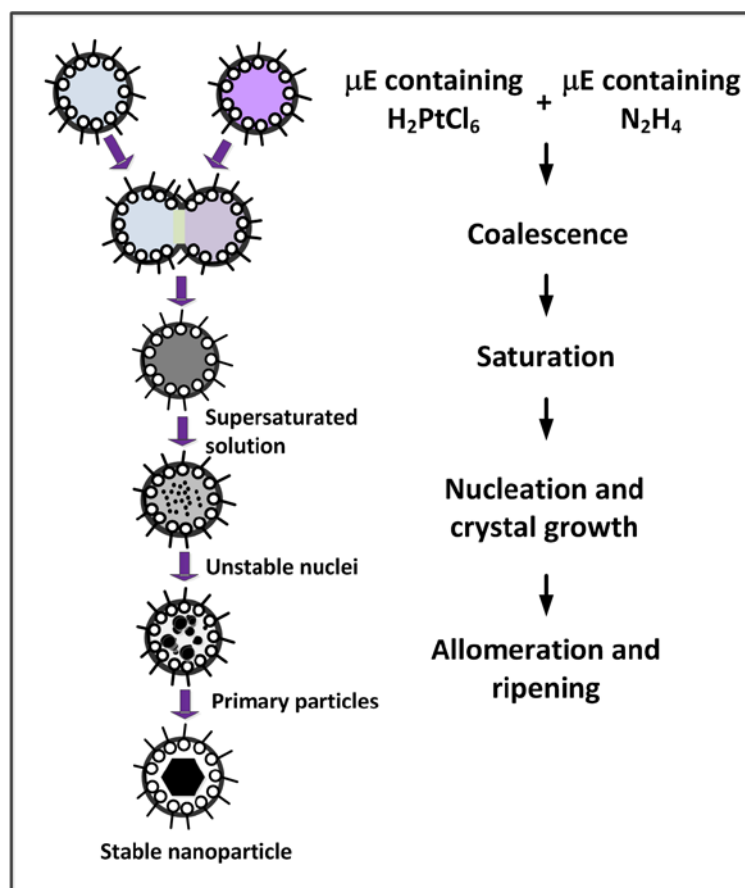

**Figure S1.** Mechanism of Pt nanoparticle formation

Table S1. Product description of support materials

| Name                                     | Product description       | Surface area [m <sup>2</sup> /g] |
|------------------------------------------|---------------------------|----------------------------------|
| $\gamma$ -Al <sub>2</sub> O <sub>3</sub> | pH neutral, M.W. = 101.96 | 155-200                          |
| SBA-15                                   | pH = 5, M.W = 60.08       | 850                              |

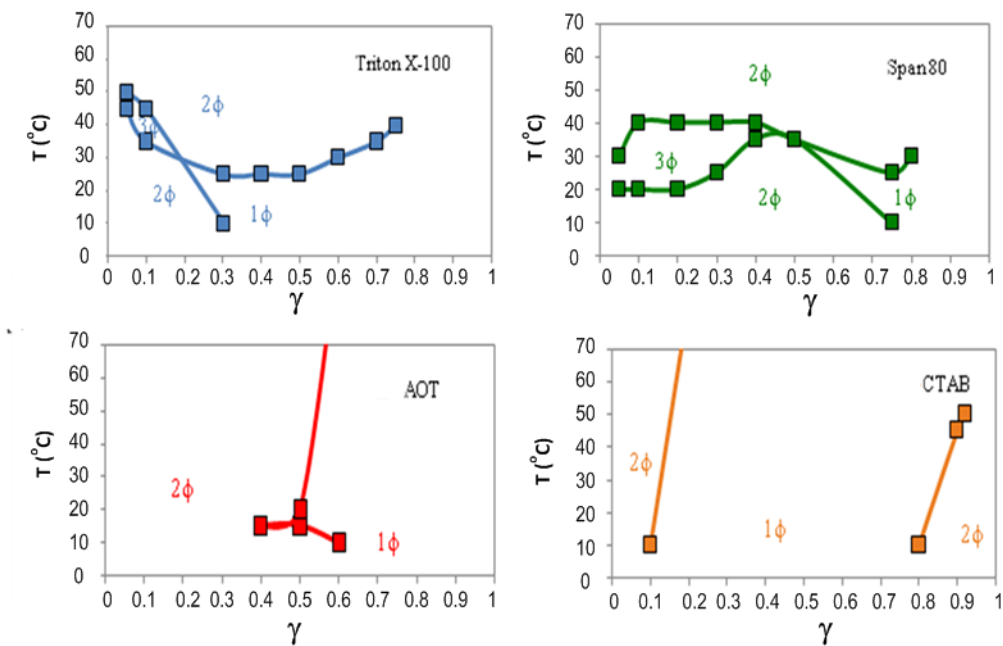

Figure S2. Phase diagram of microemulsions with equal amounts of oil and water ( $\alpha = 0.5$ ) as a function of surfactant concentration ( $\gamma$ ) and temperature ( $T$ ).

## 2. Catalytic testing of supported Pt catalyst

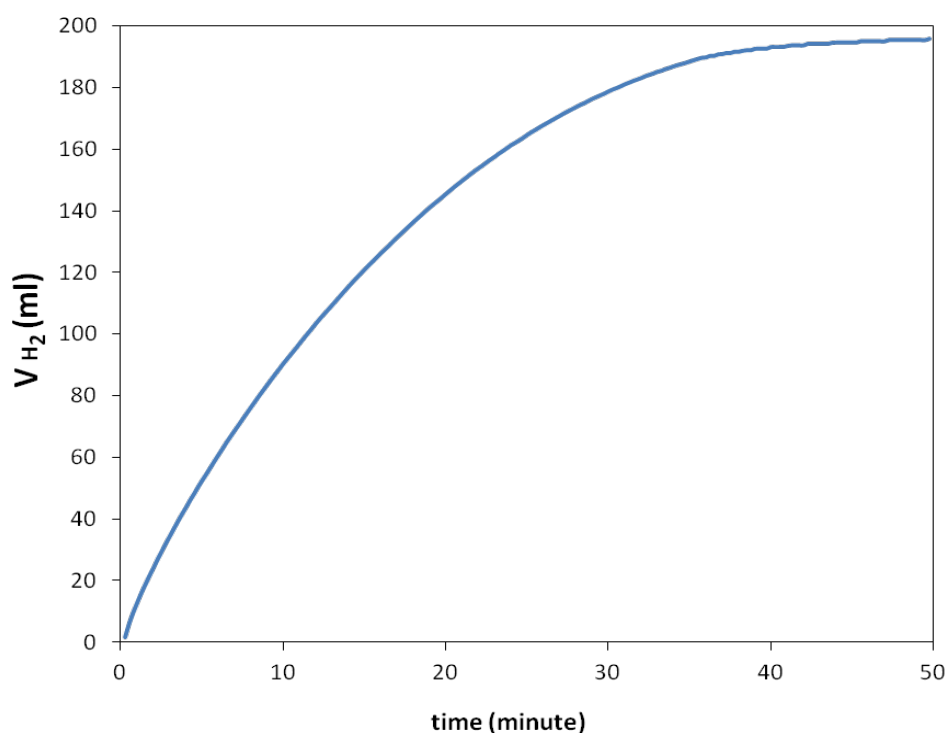

**Figure S3.** A representative profile of AMS hydrogenation with 0.01% Pt/ $Al_2O_3$  at 20°C and 1 bar

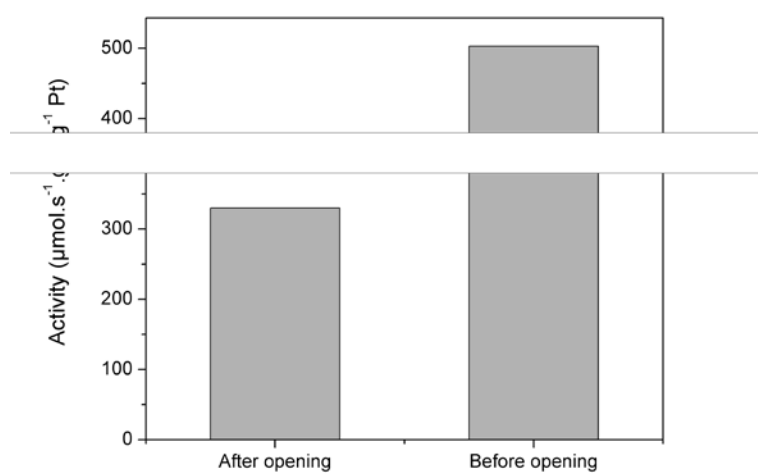

**Figure S4.** The activities of the Pt-catalysts prepared in different support feeding prior to deposition process

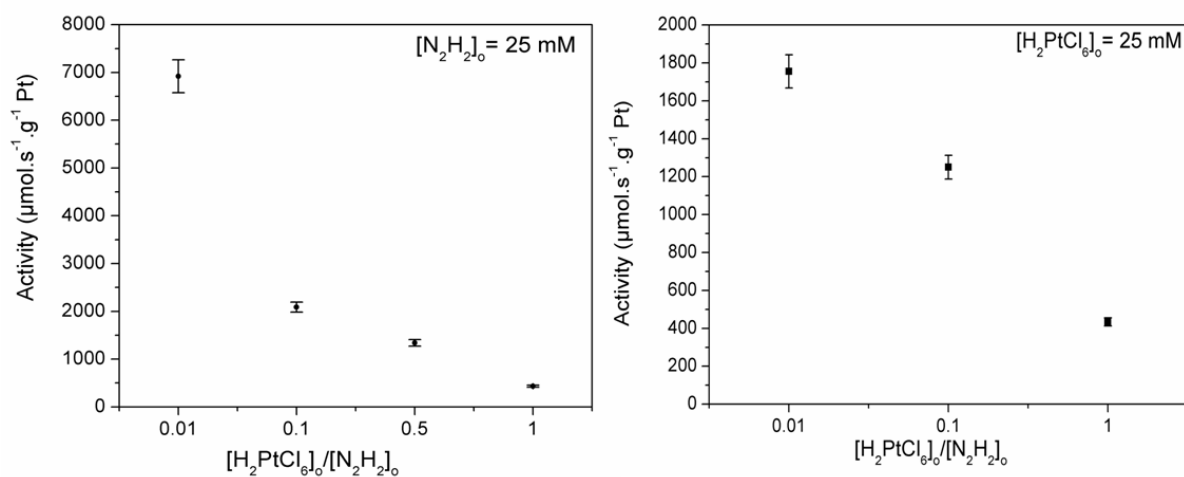

**Figure S5.** The activities of the Pt-catalysts prepared in different ratio of initial concentrations

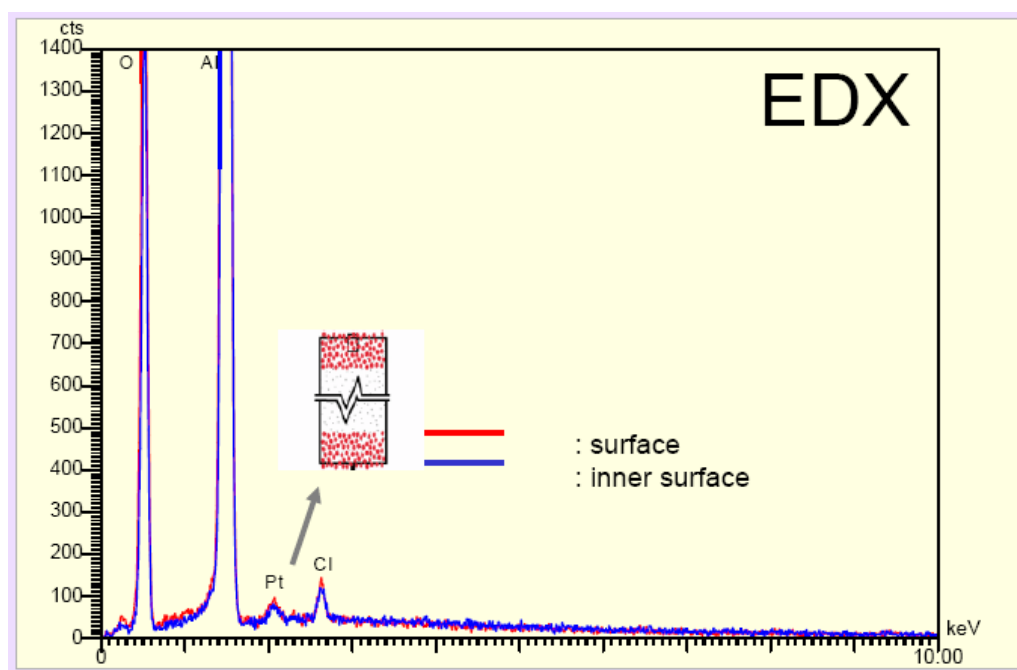

**Figure S6.** The location Pt-metal on the surface of the  $\text{Al}_2\text{O}_3$

**Table S2.** Comparison of our TEM images and Fast Fourier Transform to other results.

| Our Results                                                                                                                                                            | Other Results                                                                                                                                                                                                                                                                                 |
|------------------------------------------------------------------------------------------------------------------------------------------------------------------------|-----------------------------------------------------------------------------------------------------------------------------------------------------------------------------------------------------------------------------------------------------------------------------------------------|
| 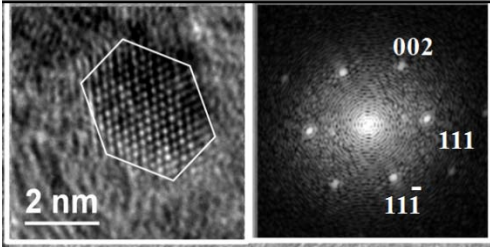<br> | <br> <p>(Ferreira et.al.)</p>                                                                                             |
|                                                                                                                                                                        |  <p>(Swaminathan et.al)</p>                                                                                                                                                                                |
|                                                                                                                                                                        | <br><br> <p>(Alayoglu.et.al)</p> |

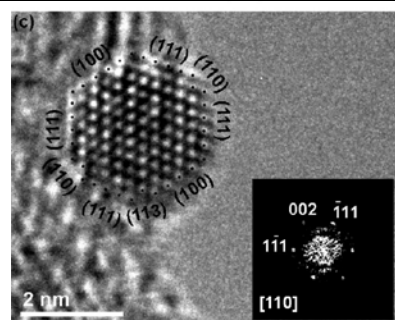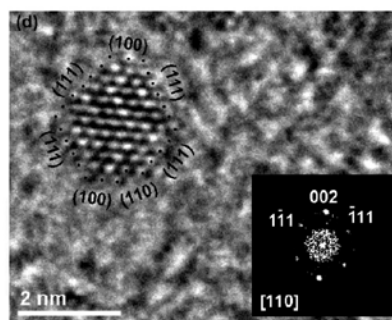

(Lee et.al)
